# Supplementary material
Source: PubMed Central journal article supplement (PMC8926024)

# Supplementary Material

## Quantifying and Examining Reserve in Symptomatic Former National Football League Players

**Supplementary Table 1.** Standardized regression coefficients of covariates age, race, CHII, and APOE and neuropsychological and neuropsychiatric tests

| Neuropsychiatric & Neuropsychological Tests | Age   |       |                 |             |             | Race  |       |                |             |             | CHII  |       |                |             | APOE ε4 status |       |       |                |             |             |
|---------------------------------------------|-------|-------|-----------------|-------------|-------------|-------|-------|----------------|-------------|-------------|-------|-------|----------------|-------------|----------------|-------|-------|----------------|-------------|-------------|
|                                             | β     | T     | p <sup>2</sup>  | 95% CI      |             | β     | T     | p <sup>2</sup> | 95% CI      |             | β     | T     | p <sup>2</sup> | 95% CI      |                | β     | T     | p <sup>2</sup> | 95% CI      |             |
|                                             |       |       |                 | Lower Bound | Upper Bound |       |       |                | Lower Bound | Upper Bound |       |       |                | Lower Bound | Upper Bound    |       |       |                | Lower Bound | Upper Bound |
| TMT Part A <sup>1</sup>                     | -0.20 | -1.97 | 0.09            | -0.40       | 0.00        | -0.31 | -3.03 | <b>0.01</b>    | -0.52       | -0.11       | -0.04 | -0.43 | 0.78           | -0.25       | 0.16           | -0.18 | -1.75 | 0.58           | -0.38       | 0.02        |
| TMT Part B <sup>1</sup>                     | -0.37 | -3.79 | <b>&lt;0.01</b> | -0.57       | -0.18       | -0.31 | -3.02 | <b>0.01</b>    | -0.51       | -0.10       | 0.07  | 0.65  | 0.78           | -0.13       | 0.26           | -0.01 | -0.13 | 0.97           | -0.21       | 0.18        |
| NAB List Learning Long Delay Recall         | -0.32 | -3.15 | <b>0.01</b>     | -0.53       | -0.12       | -0.25 | -2.44 | <b>0.03</b>    | -0.46       | -0.05       | 0.05  | 0.49  | 0.78           | -0.15       | 0.26           | -0.03 | -0.25 | 0.97           | -0.23       | 0.18        |
| COWAT                                       | -0.12 | -1.10 | 0.32            | -0.33       | 0.10        | -0.23 | -2.14 | 0.05           | -0.45       | -0.02       | -0.03 | -0.25 | 0.80           | -0.24       | 0.19           | 0.05  | 0.46  | 0.97           | -0.16       | 0.26        |
| Animal Fluency                              | -0.20 | -1.88 | 0.09            | -0.41       | 0.01        | -0.27 | -2.54 | <b>0.03</b>    | -0.49       | -0.06       | -0.10 | -0.92 | 0.78           | -0.31       | 0.11           | 0.00  | 0.04  | 0.97           | -0.20       | 0.21        |
| BRIEF-A BRI                                 | -0.06 | -0.54 | 0.59            | -0.27       | 0.16        | -0.16 | -1.42 | 0.18           | -0.37       | 0.06        | 0.15  | 1.35  | 0.78           | -0.07       | 0.36           | 0.11  | 1.01  | 0.74           | -0.10       | 0.32        |
| BDI-II                                      | -0.22 | -2.04 | 0.09            | -0.43       | -0.01       | 0.06  | 0.51  | 0.61           | -0.16       | 0.27        | 0.06  | 0.53  | 0.78           | -0.16       | 0.27           | 0.15  | 1.38  | 0.60           | -0.06       | 0.36        |

TMT, Trail Making Test; NAB, Neuropsychological Assessment Battery; COWAT, Controlled Oral Word Association Test; BRIEF-A BRI, Behavior Rating Inventory of Executive Functioning – Adult Version Behavioral Regulation Index; BDI-II, Beck Depression Inventory-II; CHII, Cumulative Head Impact Index; APOE, Apolipoprotein E.

<sup>1</sup> TMT Parts A and B were reverse coded to correct directionality (i.e., lower scores represented worse performance); <sup>2</sup> Statistical significance was defined by a false discovery rate adjusted p-value <0.05.

**Supplementary Table 2.** Standardized regression coefficients of reserve proxies WRAT-4 and education and neuropsychological and neuropsychiatric tests

| Neuropsychiatric & Neuropsychological Tests | WRAT-4  |       |                 |             | Years of Education |         |       |       | Occupational Attainment |             |         |       | Estimated Intracranial Volume |             |             |         |       |       |             |             |
|---------------------------------------------|---------|-------|-----------------|-------------|--------------------|---------|-------|-------|-------------------------|-------------|---------|-------|-------------------------------|-------------|-------------|---------|-------|-------|-------------|-------------|
|                                             | $\beta$ | T     | $p^2$           | 95% CI      |                    | $\beta$ | T     | $p^2$ | 95% CI                  |             | $\beta$ | T     | $p^2$                         | 95% CI      |             | $\beta$ | T     | $p^2$ | 95% CI      |             |
|                                             |         |       |                 | Lower Bound | Upper Bound        |         |       |       | Lower Bound             | Upper Bound |         |       |                               | Lower Bound | Upper Bound |         |       |       | Lower Bound | Upper Bound |
| TMT Part A <sup>1</sup>                     | 0.25    | 2.48  | <b>0.04</b>     | 0.05        | 0.46               | 0.05    | 0.50  | 0.99  | -0.15                   | 0.25        | -0.11   | -1.06 | 0.66                          | -0.30       | 0.09        | -0.03   | -0.23 | 0.83  | -0.25       | 0.19        |
| TMT Part B <sup>1</sup>                     | 0.07    | 0.71  | 0.48            | -0.13       | 0.28               | 0.00    | -0.01 | 0.99  | -0.20                   | 0.19        | -0.12   | -1.20 | 0.66                          | -0.31       | 0.08        | 0.08    | 0.75  | 0.79  | -0.13       | 0.30        |
| NAB List Learning Long Delay Recall         | 0.27    | 2.54  | <b>0.04</b>     | 0.06        | 0.48               | -0.01   | -0.09 | 0.99  | -0.21                   | 0.19        | -0.09   | -0.92 | 0.66                          | -0.29       | 0.11        | 0.05    | 0.46  | 0.83  | -0.17       | 0.27        |
| COWAT                                       | 0.38    | 3.54  | <b>&lt;0.01</b> | 0.17        | 0.59               | 0.00    | 0.04  | 0.99  | -0.21                   | 0.22        | 0.09    | 0.85  | 0.66                          | -0.12       | 0.30        | -0.02   | -0.21 | 0.83  | -0.26       | 0.21        |
| Animal Fluency                              | 0.24    | 2.20  | <b>0.04</b>     | 0.02        | 0.46               | -0.09   | -0.89 | 0.93  | -0.30                   | 0.11        | -0.08   | -0.72 | 0.66                          | -0.28       | 0.13        | -0.15   | -1.30 | 0.46  | -0.37       | 0.08        |
| BRIEF-A BRI                                 | -0.26   | -2.29 | <b>0.04</b>     | -0.48       | -0.03              | 0.16    | 1.57  | 0.85  | -0.04                   | 0.37        | -0.02   | -0.17 | 0.86                          | -0.23       | 0.19        | 0.20    | 1.72  | 0.31  | -0.03       | 0.43        |
| BDI-II                                      | -0.12   | -1.10 | 0.32            | -0.35       | 0.10               | 0.09    | 0.85  | 0.93  | -0.12                   | 0.30        | -0.03   | -0.30 | 0.86                          | -0.24       | 0.18        | 0.29    | 2.61  | 0.08  | 0.07        | 0.51        |

TMT, Trail Making Test; NAB, Neuropsychological Assessment Battery; COWAT, Controlled Oral Word Association Test; BRIEF-A BRI, Behavior Rating Inventory of Executive Functioning – Adult Version Behavioral Regulation Index; BDI-II, Beck Depression Inventory-II; WRAT-4, WRAT-4, The Wide Range Achievement Test-4.

<sup>1</sup> TMT Parts A and B were reverse coded to correct directionality (i.e., lower scores represented worse performance); <sup>2</sup> Statistical significance was defined by a false discovery rate adjusted p-value <0.05. Age, racial identity, CHII, and *APOE* genotype were included as covariates.

Supplementary Figure 1. Leave-one-out residuals versus original residuals

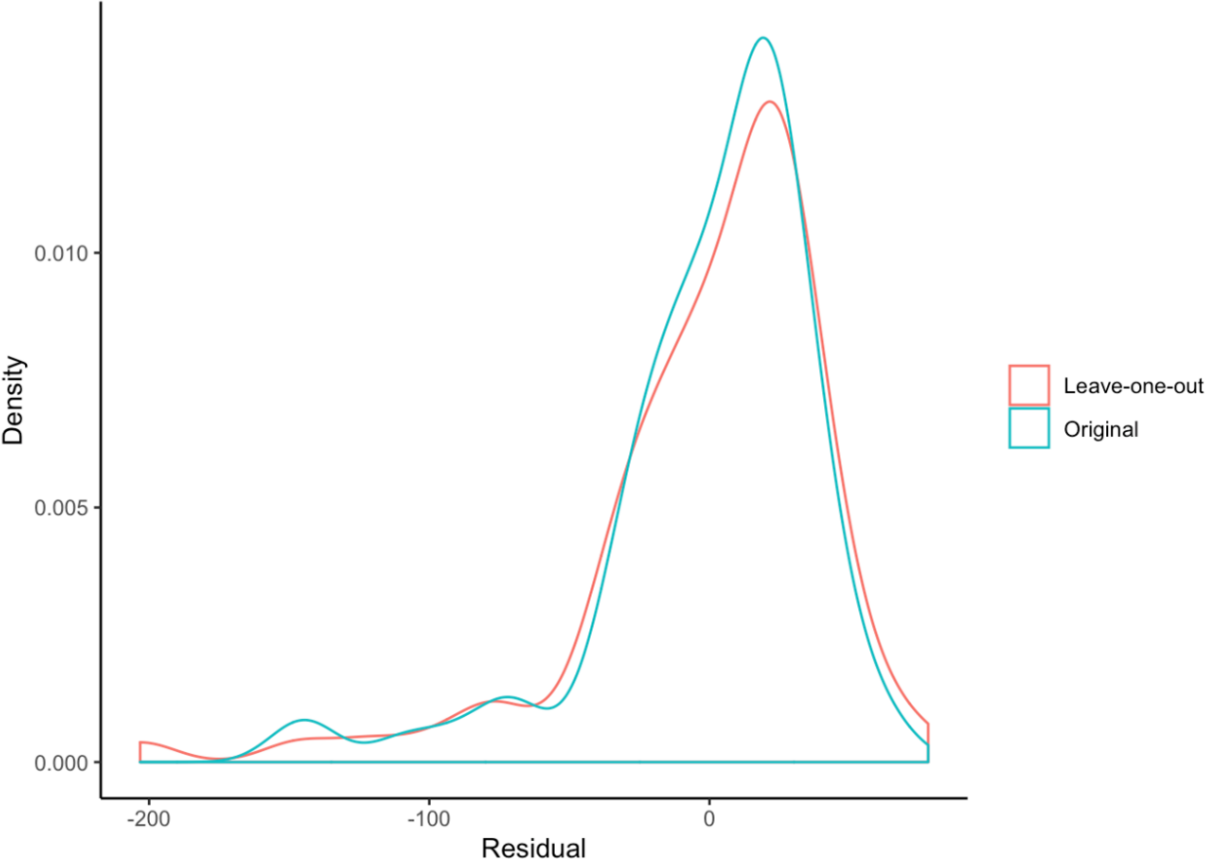

Supplement: NIHMS1780878-supplement-Supplementary_material.pdf [file NIHMS1780878-supplement-Supplementary_material.pdf]
